# Supplementary material
Source: MDPI journal article supplement (https://www.mdpi.com/2072-4292/14/13/3216)
Supplement: s1 [file s1]

**Table S1.** F1-measure (%) of the seven categories with different classification methods on spatially weakly dependent datasets in the Wuhan study area. SVM: support vector machine; RF: random forest; Resnet: deep residual network; CapsNet: capsule network; CNN: convolutional neural network (Visual Geometry Group Network16); Res2CapsNet: combination of Res2Net and CapsNet; ResCapsNet: combination of ResNet and CapsNet.

| Class              | SVM          | RF           | CapsNet      | ResNet              | CNN          | Res2CapsNet   | ResCapsNet          |
|--------------------|--------------|--------------|--------------|---------------------|--------------|---------------|---------------------|
| Surface-mined land | 86.93 ± 0.88 | 87.44 ± 0.34 | 89.63 ± 0.27 | 99.25 ± 0.36        | 98.95 ± 0.72 | 97.32 ± 0.35  | <b>99.27 ± 0.28</b> |
| Cropland           | 79.24 ± 0.94 | 76.52 ± 0.70 | 75.51 ± 0.33 | 96.75 ± 0.38        | 93.62 ± 0.39 | 94.26 ± 0.27  | <b>98.44 ± 0.39</b> |
| Forest land        | 81.96 ± 1.03 | 82.84 ± 1.07 | 84.43 ± 0.73 | 92.50 ± 1.30        | 93.28 ± 0.91 | 91.67 ± 0.73  | <b>95.71 ± 0.51</b> |
| Water              | 94.40 ± 0.20 | 90.21 ± 0.41 | 93.56 ± 0.80 | 99.24 ± 0.69        | 98.56 ± 0.39 | 97.92 ± 0.62  | <b>99.32 ± 0.40</b> |
| Road               | 71.26 ± 1.15 | 78.60 ± 1.24 | 81.42 ± 1.22 | <b>99.53 ± 0.16</b> | 95.85 ± 0.28 | 98.73 ± 0.55  | 99.38 ± 0.68        |
| Residential land   | 69.03 ± 0.99 | 65.97 ± 0.40 | 73.89 ± 0.56 | 96.76 ± 0.53        | 92.48 ± 0.56 | 92.80 ± 0.14  | <b>97.69 ± 0.27</b> |
| Bare surface land  | 95.45 ± 0.73 | 94.40 ± 0.62 | 99.26 ± 0.41 | 99.82 ± 0.12        | 98.37 ± 0.71 | <b>100.00</b> | <b>100.00</b>       |

**Table S2.** F1-measure (%) of the seven categories with different classification methods on spatially independent datasets in the Wuhan study area. SVM: support vector machine; RF: random forest; Resnet: deep residual network; CapsNet: capsule network; CNN: convolutional neural network (Visual Geometry Group Network16); Res2CapsNet: combination of Res2Net and CapsNet; ResCapsNet: combination of ResNet and CapsNet.

| Class              | SVM                 | RF           | CapsNet      | ResNet              | CNN                 | Res2CapsNet  | ResCapsNet          |
|--------------------|---------------------|--------------|--------------|---------------------|---------------------|--------------|---------------------|
| Surface-mined land | 61.54 ± 0.50        | 60.03 ± 0.73 | 61.32 ± 0.36 | <b>79.04 ± 0.29</b> | 69.55 ± 0.20        | 62.50 ± 0.31 | 76.35 ± 0.56        |
| Cropland           | 76.41 ± 0.63        | 71.25 ± 1.05 | 82.84 ± 0.93 | <b>93.25 ± 0.37</b> | 72.68 ± 0.56        | 89.03 ± 1.02 | 91.42 ± 0.54        |
| Forest land        | 93.43 ± 1.15        | 91.27 ± 1.10 | 91.26 ± 0.81 | 98.40 ± 0.84        | 97.42 ± 0.27        | 97.28 ± 0.70 | <b>100</b>          |
| Water              | 90.68 ± 0.41        | 93.26 ± 0.98 | 93.46 ± 0.57 | 93.87 ± 0.62        | <b>99.81 ± 0.61</b> | 99.34 ± 0.16 | 95.76 ± 0.27        |
| Road               | <b>81.02 ± 0.66</b> | 64.49 ± 1.49 | 37.34 ± 1.57 | 56.12 ± 1.25        | 61.02 ± 0.58        | 45.16 ± 1.22 | 55.92 ± 0.80        |
| Residential land   | 78.63 ± 0.98        | 75.22 ± 0.44 | 63.68 ± 0.74 | 72.85 ± 0.39        | 70.59 ± 0.63        | 78.63 ± 0.73 | <b>85.24 ± 1.26</b> |
| Bare surface land  | 67.24 ± 0.42        | 45.63 ± 0.79 | 62.43 ± 0.90 | 76.28 ± 0.51        | 67.23 ± 0.42        | 75.94 ± 0.53 | <b>76.44 ± 0.75</b> |

**Table S3.** F1-measure (%) of the seven categories with different classification methods on spatially weakly dependent datasets in the Xinjiang study area. SVM: support vector machine; RF: random forest; Resnet: deep residual network; CapsNet: capsule network; CNN: convolutional neural network (Visual Geometry Group Network16); Res2CapsNet: combination of Res2Net and CapsNet; ResCapsNet: combination of ResNet and CapsNet.

| Class              | SVM          | RF           | CapsNet      | ResNet              | CNN          | Res2CapsNet  | ResCapsNet          |
|--------------------|--------------|--------------|--------------|---------------------|--------------|--------------|---------------------|
| Surface-mined land | 76.78 ± 0.81 | 70.65 ± 0.67 | 90.81 ± 1.03 | <b>93.69 ± 0.31</b> | 88.56 ± 0.72 | 90.67 ± 0.55 | 92.34 ± 0.33        |
| Cropland           | 82.12 ± 0.89 | 74.63 ± 0.60 | 89.47 ± 0.35 | 94.33 ± 0.38        | 93.15 ± 0.61 | 92.91 ± 0.40 | <b>95.91 ± 0.73</b> |
| Forest land        | 90.54 ± 1.20 | 86.32 ± 1.31 | 94.26 ± 0.24 | 97.32 ± 0.92        | 94.09 ± 0.52 | 94.33 ± 0.39 | <b>97.86 ± 0.59</b> |
| Water              | 98.06 ± 0.80 | 97.04 ± 0.60 | 97.04 ± 0.87 | 97.98 ± 0.74        | 96.95 ± 0.62 | 98.27 ± 0.97 | <b>98.98 ± 0.84</b> |
| Road               | 40.17 ± 1.32 | 46.11 ± 0.75 | 81.27 ± 0.55 | <b>92.75 ± 1.07</b> | 85.04 ± 0.92 | 83.94 ± 1.24 | 90.30 ± 1.19        |
| Residential land   | 79.90 ± 0.97 | 74.49 ± 0.45 | 92.34 ± 0.26 | 95.51 ± 0.66        | 93.84 ± 0.41 | 92.45 ± 0.41 | <b>96.84 ± 0.96</b> |
| Bare surface land  | 50.31 ± 0.25 | 55.80 ± 0.44 | 60.49 ± 0.39 | 76.46 ± 0.40        | 72.41 ± 0.86 | 71.98 ± 0.19 | <b>79.76 ± 0.50</b> |

**Table S4.** F1-measure (%) of the seven categories with different classification methods on spatially independent datasets in the Xinjiang study area. SVM: support vector machine; RF: random forest; Resnet: deep residual network; CapsNet: capsule network; CNN: convolutional neural network (Visual Geometry Group Network16); Res2CapsNet: combination of Res2Net and CapsNet; ResCapsNet: combination of ResNet and CapsNet.

| Class              | SVM                 | RF                  | CapsNet      | ResNet              | CNN          | Res2CapsNet  | ResCapsNet          |
|--------------------|---------------------|---------------------|--------------|---------------------|--------------|--------------|---------------------|
| Surface-mined land | <b>82.24 ± 0.32</b> | 74.63 ± 0.67        | 74.26 ± 0.27 | 68.42 ± 0.54        | 72.35 ± 0.97 | 78.40 ± 0.58 | 77.66 ± 0.39        |
| Cropland           | 76.87 ± 0.36        | 61.42 ± 0.34        | 73.82 ± 0.49 | 84.46 ± 0.63        | 78.84 ± 0.38 | 80.14 ± 0.89 | <b>85.29 ± 0.58</b> |
| Forest land        | 90.81 ± 0.95        | 82.64 ± 0.49        | 81.63 ± 0.57 | 91.40 ± 0.70        | 90.04 ± 1.15 | 90.47 ± 0.53 | <b>96.27 ± 0.62</b> |
| Water              | 35.49 ± 0.84        | <b>48.43 ± 0.99</b> | 48.24 ± 0.89 | 35.09 ± 0.87        | 35.29 ± 1.26 | 36.67 ± 0.92 | 31.67 ± 0.74        |
| Road               | 25.45 ± 1.24        | 20.81 ± 0.65        | 19.65 ± 1.17 | 28.81 ± 1.03        | 27.47 ± 1.10 | 23.82 ± 1.21 | <b>28.85 ± 0.89</b> |
| Residential land   | 83.46 ± 0.12        | 75.49 ± 0.47        | 82.91 ± 0.52 | 81.43 ± 0.39        | 81.42 ± 0.35 | 84.69 ± 0.28 | <b>90.13 ± 0.41</b> |
| Bare surface land  | 50.83 ± 0.17        | 40.47 ± 0.29        | 48.20 ± 0.36 | <b>66.27 ± 0.30</b> | 58.44 ± 0.59 | 59.29 ± 0.36 | 65.61 ± 0.19        |

**Table S5.** Classification results using different methods under limited samples in the Wuhan study area.

| Methods    | Index    | 20                  | 30                  | 50                  |
|------------|----------|---------------------|---------------------|---------------------|
| SVM        | OA       | 74.17 ± 0.61        | 77.16 ± 1.22        | 79.73 ± 0.93        |
|            | F1-score | 72.98 ± 0.82        | 76.78 ± 0.83        | 79.36 ± 0.66        |
|            | Kappa    | 68.22 ± 0.47        | 72.86 ± 2.02        | 75.83 ± 1.62        |
| RF         | OA       | 70.57 ± 0.92        | 73.24 ± 1.13        | 75.73 ± 1.02        |
|            | F1-score | 70.10 ± 1.14        | 72.68 ± 0.95        | 75.61 ± 1.17        |
|            | Kappa    | 65.31 ± 1.08        | 68.02 ± 0.67        | 71.62 ± 2.04        |
| CapsNet    | OA       | 74.90 ± 1.47        | 78.44 ± 0.94        | 86.18 ± 1.30        |
|            | F1-score | 74.66 ± 1.25        | 78.16 ± 0.92        | 86.28 ± 1.33        |
|            | Kappa    | 70.47 ± 0.93        | 74.53 ± 1.38        | 85.04 ± 1.49        |
| ResNet     | OA       | 73.52 ± 0.81        | 76.53 ± 0.59        | 85.54 ± 1.26        |
|            | F1-score | 72.55 ± 1.26        | 76.11 ± 0.95        | 85.08 ± 0.80        |
|            | Kappa    | 67.78 ± 0.92        | 72.01 ± 0.90        | 82.29 ± 1.41        |
| CNN        | OA       | <b>75.96 ± 1.38</b> | 78.10 ± 0.65        | 79.32 ± 0.69        |
|            | F1-score | 75.12 ± 1.25        | 77.88 ± 0.66        | 77.65 ± 0.67        |
|            | Kappa    | 71.39 ± 0.89        | 74.35 ± 0.97        | 73.77 ± 1.55        |
| ResCapsNet | OA       | 75.88 ± 1.06        | <b>79.71 ± 1.55</b> | <b>87.60 ± 0.44</b> |
|            | F1-score | <b>75.35 ± 1.17</b> | <b>79.05 ± 1.53</b> | <b>87.27 ± 1.33</b> |
|            | Kappa    | <b>71.95 ± 0.96</b> | <b>75.40 ± 0.90</b> | <b>85.44 ± 0.94</b> |

**Table S6.** Classification results using different methods under limited samples in the Xinjiang study area.

| Methods    | Index    | 20                  | 30                  | 50                  |
|------------|----------|---------------------|---------------------|---------------------|
| SVM        | OA       | 62.58 ± 0.78        | 65.28 ± 1.09        | 68.45 ± 1.32        |
|            | F1-score | 62.40 ± 1.22        | 65.16 ± 0.94        | 68.37 ± 0.99        |
|            | Kappa    | 57.09 ± 1.35        | 60.12 ± 1.45        | 63.72 ± 0.95        |
| RF         | OA       | 57.68 ± 1.21        | 60.43 ± 1.45        | 64.10 ± 0.72        |
|            | F1-score | 57.16 ± 0.78        | 59.84 ± 0.59        | 63.36 ± 1.33        |
|            | Kappa    | 49.88 ± 1.04        | 52.77 ± 1.46        | 56.41 ± 1.53        |
| CapsNet    | OA       | 64.81 ± 0.76        | 68.38 ± 0.92        | 72.42 ± 1.31        |
|            | F1-score | 61.93 ± 1.24        | 62.57 ± 0.97        | 59.39 ± 1.75        |
|            | Kappa    | 57.16 ± 0.96        | 58.49 ± 0.84        | 56.73 ± 0.95        |
| ResNet     | OA       | 68.89 ± 0.80        | 70.35 ± 1.69        | 72.75 ± 1.72        |
|            | F1-score | 63.19 ± 1.54        | 65.86 ± 1.56        | 72.83 ± 1.37        |
|            | Kappa    | 59.92 ± 0.73        | 62.36 ± 1.55        | 69.17 ± 1.57        |
| CNN        | OA       | <b>68.97 ± 0.64</b> | 70.79 ± 1.59        | 73.03 ± 1.41        |
|            | F1-score | <b>64.27 ± 1.51</b> | 66.43 ± 1.22        | 68.57 ± 0.97        |
|            | Kappa    | 59.09 ± 1.54        | 61.63 ± 0.75        | 64.49 ± 0.84        |
| ResCapsNet | OA       | 68.36 ± 0.67        | <b>71.25 ± 1.29</b> | <b>75.23 ± 0.78</b> |
|            | F1-score | 63.37 ± 1.23        | <b>71.02 ± 0.81</b> | <b>74.99 ± 0.86</b> |
|            | Kappa    | <b>60.06 ± 1.04</b> | <b>66.87 ± 1.26</b> | <b>69.89 ± 1.53</b> |
